# Supplementary material for: Evaluating Temperature Effects on Bluetongue Virus Serotype 10 and 17 Coinfection in Culicoides sonorensis
Source: MDPI journal article supplement (doi:10.3390/ijms25053063), 2024-03-06
Supplement: s1 [file s1]

**Supplementary Table S1.** Pan BTV qRT-PCR ct values in duplicate for infected *C. sonorensis* pools at temperatures 20°C, 25°C, and 30°C. UD indicates an undetermined ct. N/A indicates no midges were alive for sampling.

| 20C Temperature |     | Pool A |       | Pool B |       | Pool C |      |
|-----------------|-----|--------|-------|--------|-------|--------|------|
| Infection Group | DPI | ct1    | ct2   | ct1    | ct2   | ct1    | ct2  |
| BTV-10 & 17     | 2   | 29.1   | 28.9  | 32.4   | 33.41 |        |      |
|                 | 4   | 32.4   | 32.3  | 33.7   | 32.9  | 31.9   | 31.1 |
|                 | 6   | 29.4   | 29.5  | 28.9   | 29    |        |      |
|                 | 8   | 25.2   | 25.3  | 29.1   | 29    | 26.7   | 27.4 |
|                 | 10  | 36.8   | 36.8  | 24.5   | 24.1  |        |      |
|                 | 12  | 33.4   | 33.28 | 24.4   | 24.5  | 21     | 20.5 |
|                 | 14  | 23.9   | 24    | 32.7   | 32.8  |        |      |
|                 | 16  | 20     | 20.1  | 21.8   | 23.2  | 21.8   | 21.8 |
|                 | 18  | 20.4   | 21.8  | 21     | 21.1  |        |      |
|                 |     |        |       |        |       |        |      |
| BTV-10          | 2   | 29.5   | 29.4  | 28.8   | 28.6  |        |      |
|                 | 4   | 38.4   | 37.7  | 39.6   | 37.7  | 38.3   | 39.7 |
|                 | 6   | 33.4   | 33.5  | 33.2   | 32.6  |        |      |
|                 | 8   | UD     | UD    | UD     | UD    | 36.7   | 39.5 |
|                 | 10  | UD     | UD    | 31.7   | 29.9  |        |      |
|                 | 12  | 30.8   | 30.1  | UD     | UD    | UD     | UD   |
|                 | 14  | UD     | UD    | 24.7   | 24.4  |        |      |
|                 | 16  | UD     | UD    | UD     | UD    | 22.9   | 22.9 |
|                 | 18  | 30.3   | 30.2  | 39.1   | 39.8  |        |      |
|                 |     |        |       |        |       |        |      |
| BTV-17          | 2   | 29.4   | 29.8  | 32.7   | 33.1  |        |      |
|                 | 4   | 35.9   | 36.1  | 39.2   | 37.5  | 34.9   | 35.1 |
|                 | 6   | 38.8   | 38.7  | 35.6   | 36.2  |        |      |
|                 | 8   | 29.6   | 29.5  | UD     | UD    | 29.5   | 29.2 |
|                 | 10  | 30.4   | 30.3  | 24.2   | 24.9  |        |      |
|                 | 12  | UD     | UD    | 22.5   | 22.5  | UD     | UD   |
|                 | 14  | 23.2   | 23.2  | 24.5   | 23.8  |        |      |
|                 | 16  | 25     | 25    | 23.3   | 23.7  | 20.5   | 20.5 |
|                 | 18  | 23.7   | 21.2  | UD     | UD    |        |      |
|                 |     |        |       |        |       |        |      |
| 25C Temperature |     | Pool A |       | Pool B |       | Pool C |      |
| Infection Group | DPI | ct1    | ct2   | ct1    | ct2   | ct1    | ct2  |
| BTV-10 & 17     | 2   | 32.3   | 32.4  | 34.5   | 34.9  |        |      |
|                 | 4   | 26.9   | 27.1  | 29.7   | 29.5  | 27.6   | 27.2 |
|                 | 6   | 26.3   | 26.7  | 23.4   | 25.5  |        |      |

|                 |     |        |      |        |      |        |      |
|-----------------|-----|--------|------|--------|------|--------|------|
|                 | 8   | 22.2   | 22   | 21.1   | 21.1 | 20.2   | 20.3 |
|                 | 10  | 19.4   | 19.4 | 19.7   | 19.6 |        |      |
|                 | 12  | 19.6   | 19.2 | 19.2   | 19   | 21.6   | 21.6 |
|                 | 14  | 20.2   | 20.3 | 20.3   | 20.2 |        |      |
|                 | 16  | 21.5   | 21.5 | 24.7   | 25.4 | 23.9   | 21.1 |
|                 | 18  | 23.3   | 23   | N/A    | N/A  |        |      |
|                 |     |        |      |        |      |        |      |
| BTV-10          | 2   | 38.9   | 38.1 | 38.3   | 39.9 |        |      |
|                 | 4   | 34.6   | 34.4 | UD     | UD   | UD     | UD   |
|                 | 6   | 38.5   | 38.1 | 35.8   | 36.4 |        |      |
|                 | 8   | UD     | UD   | UD     | UD   | 23.2   | 23.1 |
|                 | 10  | 25.8   | 25.8 | UD     | UD   |        |      |
|                 | 12  | UD     | UD   | UD     | UD   | UD     | UD   |
|                 | 14  | 24     | 24.9 | 22.9   | 22.6 |        |      |
|                 | 16  | N/A    | N/A  | N/A    | N/A  | N/A    | N/A  |
|                 | 18  | N/A    | N/A  | N/A    | N/A  |        |      |
|                 |     |        |      |        |      |        |      |
| BTV-17          | 2   | 37.7   | 37   | 38.7   | 38.5 |        |      |
|                 | 4   | 35.2   | 35.7 | 27.8   | 27.9 | 38.3   | 37.2 |
|                 | 6   | 31.6   | 31.7 | 31.8   | 31.7 |        |      |
|                 | 8   | 24.1   | 24.6 | 36.1   | 37.5 | 35.5   | 35.9 |
|                 | 10  | 28.2   | 28.2 | 29.5   | 30   |        |      |
|                 | 12  | 19.3   | 19.3 | 38.4   | 38   | 20.6   | 21.1 |
|                 | 14  | 21.7   | 21.5 | 22.5   | 25.6 |        |      |
|                 | 16  | UD     | UD   | 23.3   | 20.8 | 23.7   | 21.2 |
|                 | 18  | N/A    | N/A  | N/A    | N/A  |        |      |
|                 |     |        |      |        |      |        |      |
| 30C Temperature |     | Pool A |      | Pool B |      | Pool C |      |
| Infection Group | DPI | ct1    | ct2  | ct1    | ct2  | ct1    | ct2  |
| BTV-10 & 17     | 2   | 29.2   | 29.2 | 30     | 30   |        |      |
|                 | 4   | 30.5   | 30.5 | 22.5   | 22.6 | 24.6   | 24.5 |
|                 | 6   | 20.3   | 20.7 | 24.6   | 25.3 |        |      |
|                 | 8   | 24.2   | 19.8 | 23.5   | 22.6 | 20.8   | 20.5 |
|                 | 10  | 21.2   | 21.6 | 21.5   | 21.6 |        |      |
|                 | 12  | 35.4   | 36.9 | 20.2   | 20.1 | 27.9   | 28.1 |
|                 | 14  | 22     | 21.5 | 22.6   | 22.6 |        |      |
|                 | 16  | N/A    | N/A  | N/A    | N/A  | N/A    | N/A  |
|                 | 18  | N/A    | N/A  | N/A    | N/A  |        |      |
|                 |     |        |      |        |      |        |      |
| BTV-10          | 2   | UD     | UD   | UD     | UD   |        |      |
|                 | 4   | UD     | UD   | UD     | UD   | 33.3   | 33.3 |

|        |    |      |      |      |      |      |      |
|--------|----|------|------|------|------|------|------|
|        | 6  | UD   | UD   | 24.4 | 24.3 |      |      |
|        | 8  | 39   | 39.6 | N/A  | N/A  | N/A  | N/A  |
|        | 10 | N/A  | N/A  | N/A  | N/A  |      |      |
|        | 12 | N/A  | N/A  | N/A  | N/A  | N/A  | N/A  |
|        | 14 | N/A  | N/A  | N/A  | N/A  |      |      |
|        | 16 | N/A  | N/A  | N/A  | N/A  | N/A  | N/A  |
|        | 18 | N/A  | N/A  | N/A  | N/A  |      |      |
|        |    |      |      |      |      |      |      |
| BTV-17 | 2  | 39.5 | 39.5 | 30.3 | 30.2 |      |      |
|        | 4  | 29.2 | 29.5 | 30   | 32.3 | 38.1 | 38.2 |
|        | 6  | 33.8 | 25.7 | 35.1 | 34.8 |      |      |
|        | 8  | UD   | UD   | 21.9 | 22.5 | 35.7 | 35.9 |
|        | 10 | 23.8 | 23.9 | UD   | UD   |      |      |
|        | 12 | N/A  | N/A  | N/A  | N/A  | N/A  | N/A  |
|        | 14 | N/A  | N/A  | N/A  | N/A  |      |      |
|        | 16 | N/A  | N/A  | N/A  | N/A  |      |      |
|        | 18 | N/A  | N/A  | N/A  | N/A  |      |      |
